# Supplementary material for: Ionic supramolecular bonds preserve mechanical properties and enable synergetic performance at high humidity in water-borne, self-assembled nacre-mimetics
Source: Royal Society of Chemistry journal article supplement (doi:10.1039/c3nr02983b), 2013-01-01
Supplement: c3nr02983b.pdf [file c3nr02983b.pdf]

# Supplementary Information

## **Ionic supramolecular bonds preserve mechanical properties and enable synergetic performance at high humidity in water-borne, self-assembled nacre-mimetics**

**By Paramita Das and Andreas Walther\***

*DWI at RWTH Aachen University – Institute for Interactive Materials Research,  
Forckenbeckstr. 50, D-52056 Aachen;  
E-mail: walther@dwf.rwth-aachen.de*

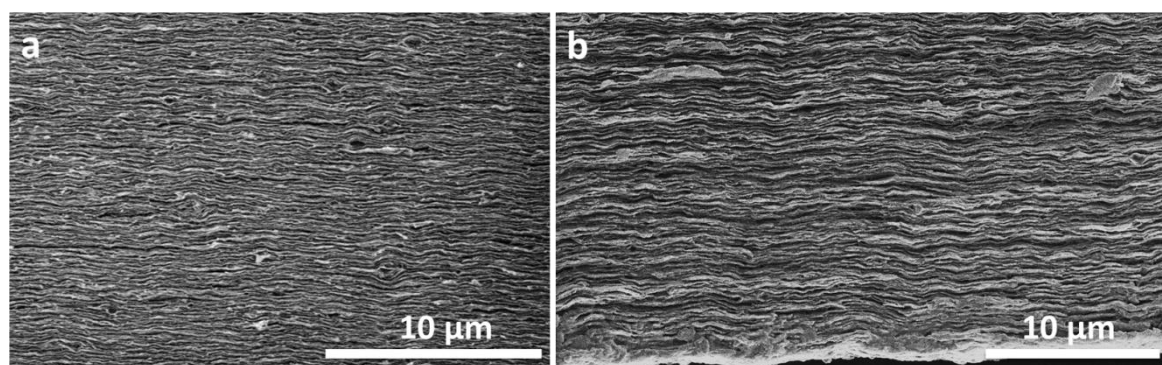

**Figure S1: SEM images of (a) pristine CMC/MTM = 60/40 and (b) Cu<sup>2+</sup> infiltrated CMC/MTM = 60/40 composites after stretching at 95 %RH**
